# Supplementary material for: Implantable Loop Recorder Monitoring for Refining Management of Children With Inherited Arrhythmia Syndromes
Source: PubMed Central journal article supplement — J Am Heart Assoc. 2016 May 26;5(6):e003632. doi: 10.1161/JAHA.116.003632 (PMC4937287; doi:10.1161/jaha.116.003632), 2016-05-26
Supplement: JAH3-5-e003632-s001.pdf [file JAH3-5-e003632-s001.pdf]

# Supplemental Material

| <b>Substrate</b> | <b># of transmissions</b>      | <b>Symptom transmissions</b> | <b>Automatic transmissions</b> | <b>Routine transmissions</b> |
|------------------|--------------------------------|------------------------------|--------------------------------|------------------------------|
| LQTS             | Total, n=58                    | 12                           | 5                              | 34                           |
|                  | Actionable transmissions, n=1  | 1                            | 0                              | 0                            |
| CPVT             | Total, n=100                   | 17                           | 34                             | 49                           |
|                  | Actionable transmissions, n=10 | 3                            | 7                              | 0                            |
| ARVD             | Total, n=8                     | 2                            | 3                              | 3                            |
|                  | Actionable transmissions, n=1  | 0                            | 1                              | 0                            |
| BrS              | Total, n=6                     | 4                            | 0                              | 2                            |
|                  | Actionable transmissions, n=0  | 0                            | 0                              | 0                            |
| Total            | Total transmissions            | 42                           | 42                             | 88                           |
|                  | Actionable transmissions, n=12 | 4                            | 8                              | 0                            |

Table S1:

**Number of symptom, automatic and routine standard of care transmissions by disease substrate. CPVT =**

Catecholaminergic polymorphic ventricular tachycardia,

LQTS = Long QT syndrome, BrS = Brugada syndrome,

and ARVC = Arrhythmogenic right ventricular cardiomyopathy.
